# Supplementary material for: Cu/ZnOx@UiO-66 synthesized from a double solvent method as an efficient catalyst for CO2 hydrogenation to methanol
Source: Royal Society of Chemistry journal article supplement (doi:10.1039/d0cy02450c), 2021-01-01
Supplement: d0cy02450c1.pdf [file d0cy02450c1.pdf]

## Supporting information

### **Cu/ZnO<sub>x</sub>@UiO-66 synthesized from a double solvents method as an efficient catalyst for CO<sub>2</sub> hydrogenation to methanol**

Yang Yang,<sup>‡a</sup> Yanan Xu,<sup>‡a</sup> Heng Ding,<sup>a</sup> Dong Yang,<sup>a</sup> Enping Cheng,<sup>a</sup> Yiming Hao,<sup>a</sup> Hongtao Wang,<sup>a</sup> Yanzhen Hong,<sup>a</sup> Yuzhong Su,<sup>a</sup> Yanliang Wang,<sup>\*a</sup> Li Peng,<sup>\*a</sup> Jun Li<sup>\*a, b, c</sup>

---

<sup>a</sup> College of Chemistry and Chemical Engineering, Xiamen University, Xiamen 361005, China.

<sup>b</sup> National Engineering Laboratory for Green Chemical Productions of Alcohols, Ethers and Esters, Xiamen University, Xiamen 361005, China.

<sup>c</sup> Collaborative Innovation Center of Chemistry for Energy Materials, Xiamen 361005, China.

E-mail: ylwang@xmu.edu.cn, li.peng@xmu.edu.cn, junnyxm@xmu.edu.cn

‡ These authors contributed equally.

† Electronic Supplementary Information (ESI) available: characterization. See DOI: 10.1039/b000000x/

## 1. Loading Zn on MOF(UiO-66)

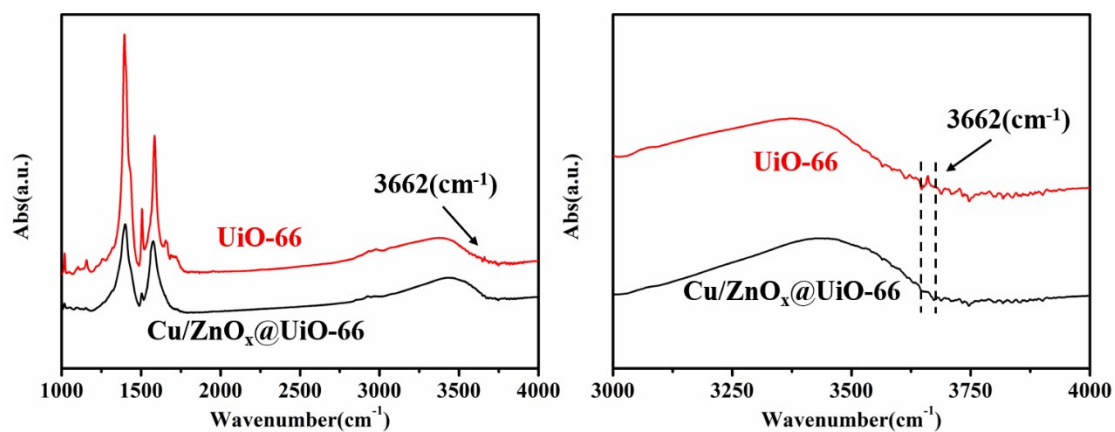

Figure S1. FT-IR spectra of UiO-66.

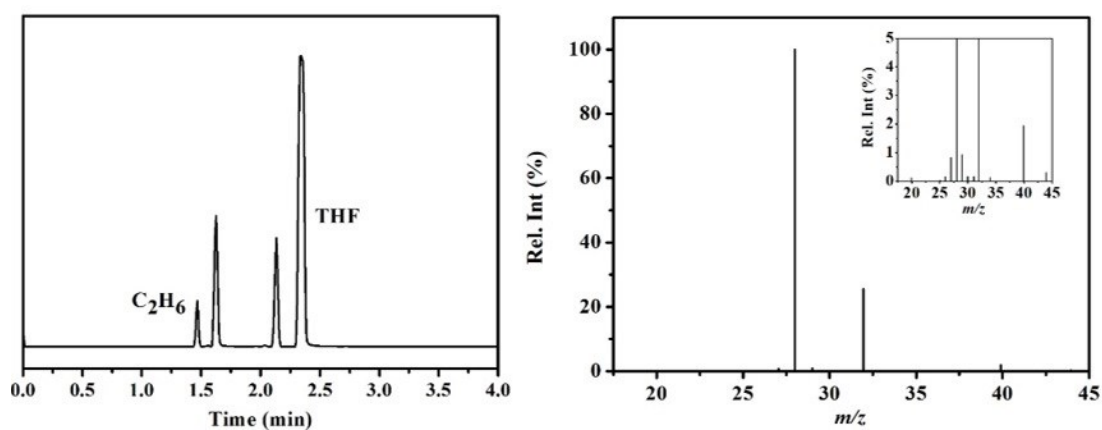

Figure S2. GC-MS results of THF solution which was left from the step of loading Zn with Zn(Et)<sub>2</sub>.

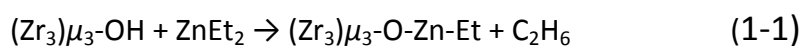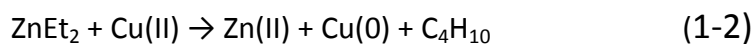

The disappearance of (O-H) FT-IR peak at 3662 cm<sup>-1</sup> in the SBUs and appearance of C<sub>2</sub>H<sub>6</sub> in the THF solution can verify the correctness of the above equations.

## 2. H<sub>2</sub>-TPR of Cu/ZnO<sub>x</sub>@UiO-66

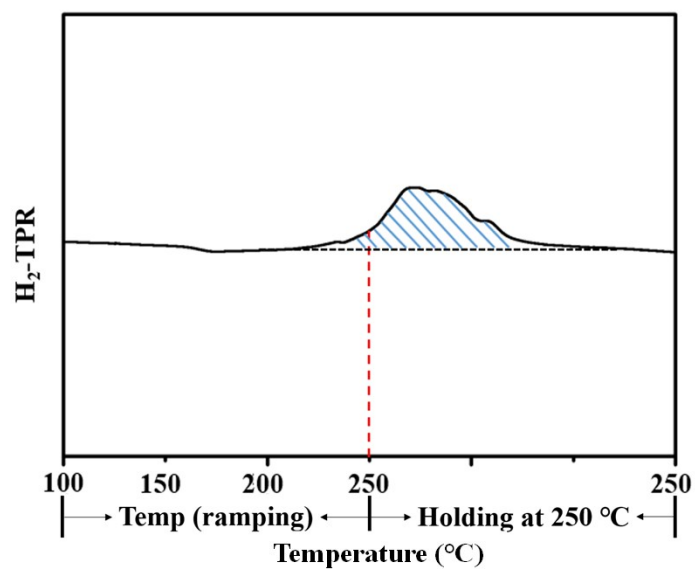

Figure S3. H<sub>2</sub>-TPR of Cu/ZnO<sub>x</sub>@UiO-66.

## 3. XRD patterns, TEM, and the performance of catalyst Cu/ZnO on UiO-66

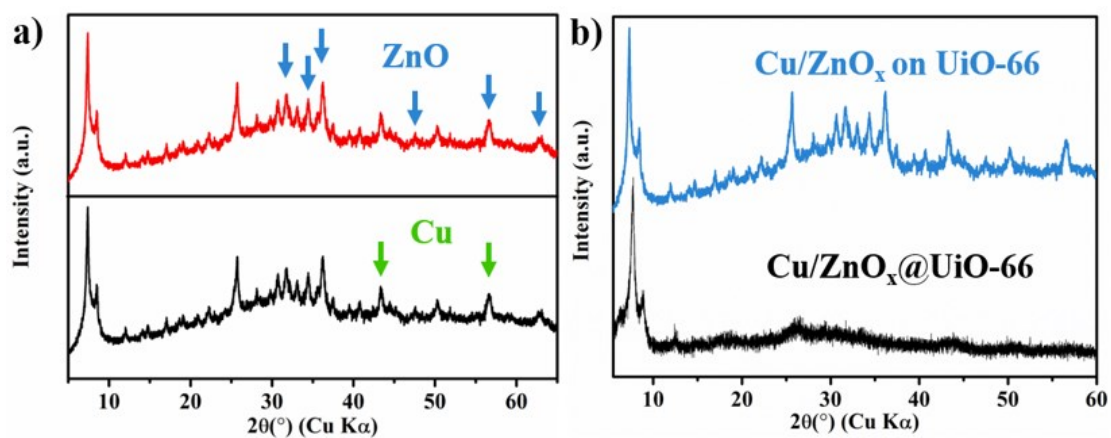

Figure S4. XRD patterns of Cu/ZnO on UiO-66.

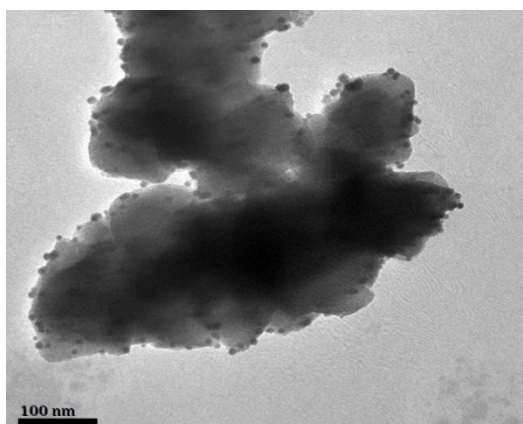

Figure S5. TEM pattern of Cu/ZnO on UiO-66.

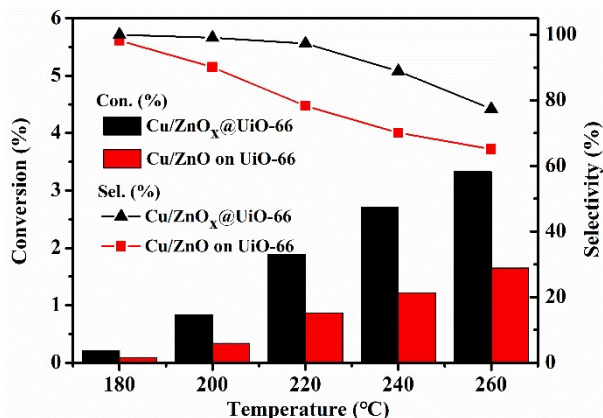

**Figure S6.** The conversion rate and selectivity of Cu/ZnO on UiO-66.

(P=4.0 MPa, GHSV=12000 h<sup>-1</sup>)

#### 4. XRD patterns and TEM of catalyst Cu@UiO-66

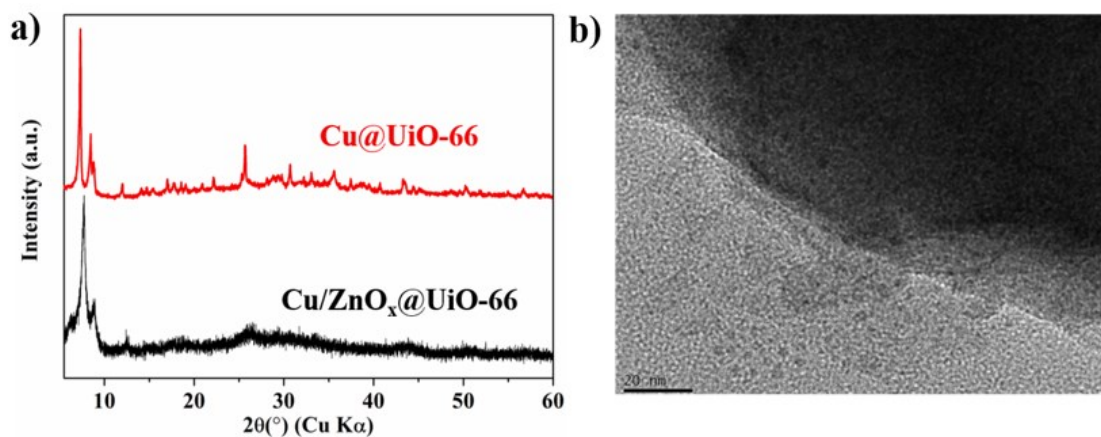

**Figure S7.** XRD and TEM patterns of Cu@UiO-66.

#### 5. The structure diagram of the reaction tube

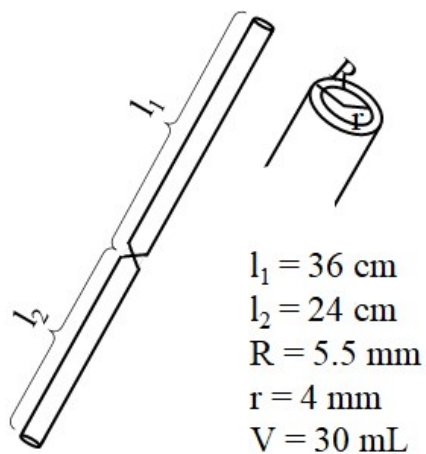

**Figure S8.** The structure diagram of the reaction tube.

## 6. The XRD of Cu/ZnO<sub>x</sub>@UiO-66 before and after the reaction

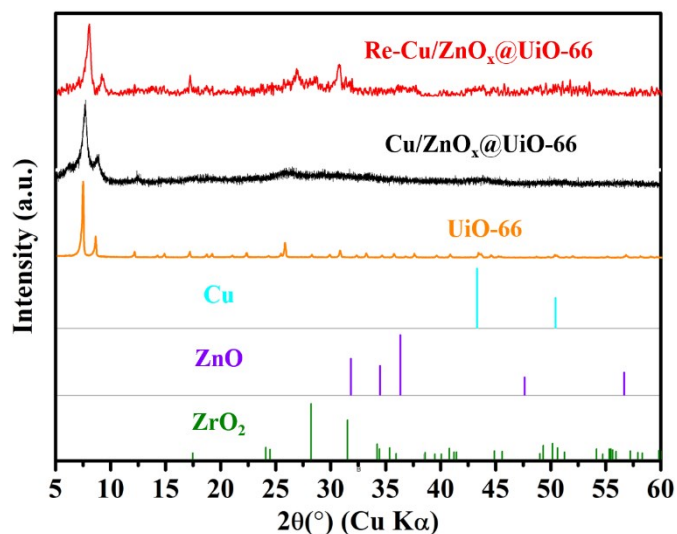

Figure S9. The XRD patterns of Cu/ZnO<sub>x</sub>@UiO-66 before (black) and after the reaction (red).

## 7. Table S1. Comparison with copper-based representative catalysts for the hydrogenation of CO<sub>2</sub> to methanol

|                                                                                                                        | Cu<br>(wt.%) | Gas Flow                         | CO <sub>2</sub> conv.<br>(%) | Select.<br>(%) | STY<br>(kg <sub>MeOH</sub> /kg <sub>Cu</sub> ·h <sup>-1</sup> ) | TOF×10 <sup>3</sup><br>(s <sup>-1</sup> ) | STY<br>(g <sub>MeOH</sub> /kg <sub>Cat</sub> ·h <sup>-1</sup> ) |
|------------------------------------------------------------------------------------------------------------------------|--------------|----------------------------------|------------------------------|----------------|-----------------------------------------------------------------|-------------------------------------------|-----------------------------------------------------------------|
| Cu/ZnO <sub>x</sub> @UiO-66                                                                                            | 5.86         | 18000(h <sup>-1</sup> )          | 3.00                         | 87.5           | 1.66                                                            | 6.62                                      | 97.3                                                            |
| (In this work)                                                                                                         | 5.86         | 12000(h <sup>-1</sup> )          | 3.51                         | 86.1           | 1.27                                                            | 5.08                                      | 74.4                                                            |
|                                                                                                                        | 5.86         | 6000(h <sup>-1</sup> )           | 4.39                         | 84.2           | 0.78                                                            | 3.12                                      | 45.7                                                            |
|                                                                                                                        | 5.86         | 1500(h <sup>-1</sup> )           | 7.33                         | 82.4           | 0.32                                                            | 1.28                                      | 18.8                                                            |
| Cu@UiO-66                                                                                                              | 6.65         | 12000(h <sup>-1</sup> )          | 1.72                         | 60.2           | 0.38                                                            | 1.53                                      | 25.2                                                            |
| Cu/ZnO on UiO-66                                                                                                       | 6.21         | 12000(h <sup>-1</sup> )          | 0.44                         | 85.3           | 0.15                                                            | 0.48                                      | 9.3                                                             |
| Cu/ZnO/Al <sub>2</sub> O <sub>3</sub>                                                                                  | 50.13        | 12000(h <sup>-1</sup> )          | 9.72                         | 47.2           | 0.23                                                            | -                                         | 115.3                                                           |
|                                                                                                                        | 50.13        | 6000(h <sup>-1</sup> )           | 10.24                        | 40.1           | 0.10                                                            | -                                         | 50.1                                                            |
| Cu-ZnO-Al <sub>2</sub> O <sub>3</sub> <sup>†</sup><br>(3 MPa, 250 °C) <sup>1</sup>                                     | 50.8         | 2600<br>(mL/g <sub>cat</sub> /h) | 6.30                         | 68.6           | 0.09                                                            | -                                         | 44.7                                                            |
| Cu/Zn@UiO-bpy<br>(4 MPa, 250 °C) <sup>2</sup>                                                                          | 6.9          | 18000(h <sup>-1</sup> )          | 3.3                          | 100            | 2.59                                                            | 2.96                                      | -                                                               |
| Cu@UiO-66<br>(1MPa , 175 °C) <sup>3</sup>                                                                              | -            | 28scem                           | 3                            | 100            | -                                                               | 3.7                                       | -                                                               |
| Cu@ZnO <sub>x</sub> (core-shell)<br>(3 MPa, 250 °C) <sup>4</sup>                                                       | -            | 18000(h <sup>-1</sup> )          | 2.3                          | 100            | -                                                               | -                                         | 147.2                                                           |
| La <sub>0.5</sub> Zr <sub>0.2</sub> Cu <sub>0.7</sub> Zn <sub>0.3</sub> O <sub>x</sub><br>(5 MPa, 250 °C) <sup>5</sup> | -            | 3600(h <sup>-1</sup> )           | 12.6                         | 52.5           | -                                                               | -                                         | 100.0                                                           |
| Pd-Cu/SBA-15<br>(4.1 MPa, 250 °C) <sup>6</sup>                                                                         | 10           | 3600(h <sup>-1</sup> )           | 6.5                          | 23             | 0.23                                                            | -                                         | 23.0                                                            |
| Pd-Cu/SiO <sub>2</sub><br>(4.1 MPa, 250 °C) <sup>6</sup>                                                               | 10           | 3600(h <sup>-1</sup> )           | 6.6                          | 34             | 0.36                                                            | -                                         | 35.7                                                            |
| LDH30Ga<br>(4.5 MPa, 270 °C) <sup>7</sup>                                                                              | 33.5         | 18000<br>(mL/g/h)                | ~20                          | ~48            | 1.76                                                            | -                                         | 590.0                                                           |
| C6Z3Z1-OX<br>(3 MPa, 240 °C) <sup>8</sup>                                                                              | 45.4         | 10000(h <sup>-1</sup> )          | 18.0                         | 51.2           | 0.67                                                            | -                                         | 305.0                                                           |

\* Commercial benchmark catalyst. In this work, reaction condition: T = 250 °C, P = 4.0 MPa (H<sub>2</sub>/CO<sub>2</sub>=3).

## References

1. X. Fang, Y. Men, F. Wu, Q. Zhao, R. Singh, P. Xiao, T. Du and P. A. Webley, *Chem. Eng. J.*, 2019, 378.
2. B. An, J. Zhang, K. Cheng, P. Ji, C. Wang and W. Lin, *J. Am. Chem. Soc.*, 2017, 139, 3834-3840.
3. Rungtaweeworanit, J. Baek, J. R. Araujo, B. S. Archanjo, K. M. Choi, O. M. Yaghi and G. A. Somotjai, *Nano Lett.*, 2016, 16, 7645-7649.
4. A. Le Valant, C. Comminges, C. Tisseraud, C. Canaff, L. Pinard and Y. Pouilloux, *J. Catal.*, 2015, 324, 41-49.
5. H. Zhan, F. Li, P. Gao, N. Zhao, F. Xiao, W. Wei, L. Zhong and Y. Sun, *J. Power Sources*, 2014, 251, 113-121.
6. X. Jiang, N. Koizumi, X. Guo and C. Song, *Appl. Catal., B*, 2015, 170-171, 173-185.
7. M. M. J. Li, C. Chen, T. Ayvali, H. Suo, J. Zheng, I. F. Teixeira, L. Ye, H. Zou, D. O'Hare and S. C. E. Tsang, *ACS Catal.*, 2018, **8**, 4390-4401.
8. G. Bonura, M. Cordaro, C. Cannilla, F. Arena and F. Frusteri, *Appl. Catal., B*, 2014, **152**, 152-161.
